# Supplementary material for: Asthma in COVID-19 Hospitalizations: An Overestimated Risk Factor?
Source: PubMed Central journal article supplement — Ann Am Thorac Soc. 2020 Dec;17(12):1645–8. doi: 10.1513/AnnalsATS.202006-613RL (PMC7706599; doi:10.1513/annalsats.202006-613rl), 2020-12
Supplement: AnnalsATS.202006-613RL_broadhurst_data_supplement.pdf [file AnnalsATS.202006-613RL_broadhurst_data_supplement.pdf]

## Online Supplements

### **Asthma in COVID-19 Hospitalizations: An Overestimated Risk Factor?**

Richard Broadhurst, Ryan Peterson, Juan P. Wisnivesky, Alex Federman, Shanta M. Zimmer, Sunita Sharma, Michael Wechsler, Fernando Holguin

Review references and asthma population prevalence references (both related to studies in Figure 2) are listed in our Supplement.

A complete list of studies considered, analysis code, and regression table are available as supplemental materials upon request.

#### **Review References (for studies in Figure 2):**

1. Jacobs JP, Stammers AH, St Louis J, et al. Extracorporeal Membrane Oxygenation in the Treatment of Severe Pulmonary and Cardiac Compromise in COVID-19: Experience with 32 patients. *ASAIO J*. Published online April 17, 2020. doi:[10.1097/MAT.0000000000001185](https://doi.org/10.1097/MAT.0000000000001185)
2. Borba MGS, Val FFA, Sampaio VS, et al. Effect of High vs Low Doses of Chloroquine Diphosphate as Adjunctive Therapy for Patients Hospitalized With Severe Acute Respiratory Syndrome Coronavirus 2 (SARS-CoV-2) Infection: A Randomized Clinical Trial. *JAMA Netw Open*. 2020;3(4):e208857. doi:[10.1001/jamanetworkopen.2020.8857](https://doi.org/10.1001/jamanetworkopen.2020.8857)
3. Zhang J, Dong X, Cao Y, et al. Clinical characteristics of 140 patients infected with SARS-CoV-2 in Wuhan, China. *Allergy*. 2020;n/a(n/a). doi:[10.1111/all.14238](https://doi.org/10.1111/all.14238)
4. Richardson S, Hirsch JS, Narasimhan M, et al. Presenting Characteristics, Comorbidities, and Outcomes Among 5700 Patients Hospitalized With COVID-19 in the New York City Area. *JAMA*. Published online April 22, 2020. doi:[10.1001/jama.2020.6775](https://doi.org/10.1001/jama.2020.6775)
5. Petrilli CM, Jones SA, Yang J, et al. Factors associated with hospital admission and critical illness among 5279 people with coronavirus disease 2019 in New York City: prospective cohort study. *BMJ*. 2020;369. doi:[10.1136/bmj.m1966](https://doi.org/10.1136/bmj.m1966)
6. Li X, Xu S, Yu M, et al. Risk factors for severity and mortality in adult COVID-19 inpatients in Wuhan. *J Allergy Clin Immunol*. Published online April 12, 2020. doi:[10.1016/j.jaci.2020.04.006](https://doi.org/10.1016/j.jaci.2020.04.006)
7. Haberman R, Axelrad J, Chen A, et al. Covid-19 in Immune-Mediated Inflammatory Diseases — Case Series from New York. *New England Journal of Medicine*. Published online April 29, 2020. doi:[10.1056/NEJMc2009567](https://doi.org/10.1056/NEJMc2009567)

8. Guan W-J, Liang W-H, Zhao Y, et al. Comorbidity and its impact on 1590 patients with Covid-19 in China: A Nationwide Analysis. *Eur Respir J*. Published online March 26, 2020. doi:[10.1183/13993003.00547-2020](https://doi.org/10.1183/13993003.00547-2020)
9. Gold JAW. Characteristics and Clinical Outcomes of Adult Patients Hospitalized with COVID-19 — Georgia, March 2020. *MMWR Morb Mortal Wkly Rep*. 2020;69. doi:[10.15585/mmwr.mm6918e1](https://doi.org/10.15585/mmwr.mm6918e1)
10. Garg S. Hospitalization Rates and Characteristics of Patients Hospitalized with Laboratory-Confirmed Coronavirus Disease 2019 — COVID-NET, 14 States, March 1–30, 2020. *MMWR Morb Mortal Wkly Rep*. 2020;69. doi:[10.15585/mmwr.mm6915e3](https://doi.org/10.15585/mmwr.mm6915e3)
11. Es K, Bs C, Ck K, et al. Clinical Course and Outcomes of Patients With Severe Acute Respiratory Syndrome Coronavirus 2 Infection: A Preliminary Report of the First 28 Patients From the Korean Cohort Study on COVID-19. *Journal of Korean medical science*. doi:[10.3346/jkms.2020.35.e142](https://doi.org/10.3346/jkms.2020.35.e142)
12. Docherty AB, Harrison EM, Green CA, et al. Features of 20 133 UK patients in hospital with covid-19 using the ISARIC WHO Clinical Characterisation Protocol: prospective observational cohort study. *BMJ*. 2020;369. doi:[10.1136/bmj.m1985](https://doi.org/10.1136/bmj.m1985)
13. CDCMMWR. Preliminary Estimates of the Prevalence of Selected Underlying Health Conditions Among Patients with Coronavirus Disease 2019 — United States, February 12–March 28, 2020. *MMWR Morb Mortal Wkly Rep*. 2020;69. doi:[10.15585/mmwr.mm6913e2](https://doi.org/10.15585/mmwr.mm6913e2)
14. Argenziano MG, Bruce SL, Slater CL, et al. Characterization and clinical course of 1000 patients with coronavirus disease 2019 in New York: retrospective case series. *BMJ*. 2020;369. doi:[10.1136/bmj.m1996](https://doi.org/10.1136/bmj.m1996)
15. Arentz M, Yim E, Klaff L, et al. Characteristics and Outcomes of 21 Critically Ill Patients With COVID-19 in Washington State. *JAMA*. Published online March 19, 2020. doi:[10.1001/jama.2020.4326](https://doi.org/10.1001/jama.2020.4326)

**Asthma Population Prevalence References (for population prevalence values in Figure 2):**

1. dos Santos FM, Viana KP, et al. Trend of self-reported asthma prevalence in Brazil from 2003 to 2013 in adults and factors associated with prevalence. *J. bras. pneumol*. 2018;44(6):491-497. doi:[10.1590/s1806-37562017000000328](https://doi.org/10.1590/s1806-37562017000000328)
2. Huang K, Yang T, Xu J, et al. Prevalence, risk factors, and management of asthma in China: a national cross-sectional study. *Lancet*. 2019;394(10196):407-418. doi:[10.1016/S0140-6736\(19\)31147-X](https://doi.org/10.1016/S0140-6736(19)31147-X)

3. Ha J, Lee SW, Yon DK. 10-year trends and prevalence of asthma, allergic rhinitis, and atopic dermatitis among the Korean population, 2008-2017 [published online ahead of print, 2020 Jan 29]. *Clin Exp Pediatr*. 2020;10.3345/cep.2019.01291. doi:[10.3345/cep.2019.01291](https://doi.org/10.3345/cep.2019.01291)

4. Mukherjee, M., Stoddart, A., Gupta, R.P. et al. The epidemiology, healthcare and societal burden and costs of asthma in the UK and its member nations: analyses of standalone and linked national databases. *BMC Med*. 2016;14(113). doi:[10.1186/s12916-016-0657-8](https://doi.org/10.1186/s12916-016-0657-8)

5. Centers for Disease Control and Prevention (CDC). Behavioral Risk Factor Surveillance System Survey Data. Atlanta, Georgia: U.S. Department of Health and Human Services, Centers for Disease Control and Prevention, 2018. [https://www.cdc.gov/asthma/brfss/2018/current\\_C1-H.pdf](https://www.cdc.gov/asthma/brfss/2018/current_C1-H.pdf)
